# Supplementary material for: The Effect of Inulin on Lifespan, Related Gene Expression and Gut Microbiota in InRp5545/TM3 Mutant Drosophila melanogaster: A Preliminary Study
Source: PubMed Central journal article supplement (PMC6470987; doi:10.3390/nu11030636), 2019-03-15
Supplement: nutrients-11-00636-s001.pdf [file nutrients-11-00636-s001.pdf]

**Table S1. Primer Sequences of qRT-PCR used in this study**

| Gene            | Primer sequences (5'→3')                        | Reference |
|-----------------|-------------------------------------------------|-----------|
| <i>cat</i>      | CCTCTGATTCCTGTGGGCAA; GACGACCATGCAGCATCTTG      | [1]       |
| <i>sod2</i>     | AATTCGCAAACCTGCAAGC; TGATGCAGCTCCATGATCTC       | [2]       |
| <i>gstd2</i>    | CTCCAATGTCTCCAGGTGGT; CCCAGTTCTCATCCCATCC       | [2]       |
| <i>gclc</i>     | CGAGGAGAATGAGCTGTTCC; ACCAGACCCGGAAAAACG        | [2]       |
| <i>hsp68</i>    | GGAGGCTCCACTCGTATTCC; TCTTCCGCCGAAGAAGTT        | [3]       |
| <i>hsc70-5</i>  | GGAATTGATATCCGCAAGGA; TCAGCTTCAGGTTTCATGTGC     | [2]       |
| <i>hsp60</i>    | TGATGCTGATCTCGTCAAGC; TACTCGGAGGTGGTGTCTC       | [2]       |
| <i>Sir2</i>     | CCGTTACTGAGGAGGAGCTG; GTAGATCGCACACGTCCTTG      | [4]       |
| <i>Srl</i>      | CTCTTGAGTCCGAGATCCGCAA; GGGACCGCGAGCTGATGGTT    | [4]       |
| <i>dpt</i>      | GTTACCATGTCGCGCTTAC;<br>CCCAAGTGCTGTCCATATCCTCC | [2]       |
| <i>attA</i>     | CACAATGTGGTGGGTCAGG; GGCACCATGACCAGCATT         | [2]       |
| <i>dro</i>      | CCATCGAGGATCACCTGACT; CTTTAGGCGGGCAGAATG        | [2]       |
| <i>bsk</i>      | CACTCAGCAGGAATTATTCACAGA; TTAGAGTGCAGTCGGCCTTT  | [3]       |
| <i>Relish</i>   | GACCCGAAAGCTCGGCGCAA; TCGCTCACGAGTTGCGAGCAA     | [5]       |
| <i>Spn43Aa</i>  | TGATCATCTCGCCGGTTTC; CAGACCATCTTTGCTCTCCTT      | [6]       |
| <i>upd3</i>     | ACTGGGAGAACACCTGCAAT; GCCCGTTGGTTCTGTAGAT       | [7]       |
| <i>dllp5</i>    | CAAACGAGGCACCTTGGG; AGCTATCCAAATCCGCCA          | [3]       |
| <i>dllp2</i>    | ATCCCGTGATTCCACACAAG; GCGGTTCCGATATCGAGTTA      | [3]       |
| <i>dllp3</i>    | CCGAAACTCTCTCCAAGCTC; GCCATCGATCTGATTGAAGTT     | [3]       |
| <i>E74B</i>     | GAATCCGTAGCCTCCGACTGT; AGGAGGGAGAGTGGTGGTGT     | [2]       |
| <i>impl2</i>    | GCCGATACCTTCGTGTATCC; TTTCCGTCGTCAATCCAATAG     | [2]       |
| <i>dfoxo</i>    | TCGAGTGCAATGTCGAGGAG; AGCGGTATATTGATGTCCAGCAG   | [3]       |
| <i>InR</i>      | AACAGTGGCGGATTCCGTT; TACTCGGAGCATTGGAGGCAT      | [2]       |
| <i>PGRP-sc2</i> | CCAAGTCTATCGGCATCTCC; GAGCAGAGGTGAGGGTGTG       | [2]       |
| <i>S6K</i>      | TGACCTAGAACCGGAATTGTG; TCCTCGCAGAGCTGTATGG      | [3]       |
| <i>Tor</i>      | GCTCAGAGGCGAGAGACAAG; CCAGCTCACGGAGGATAAAG      | [3]       |
| <i>4E-BP</i>    | CCAGATGCCCCGAGGTGTA; AGCCCGCTCGTAGATAAGTTT      | [3]       |
| <i>chico</i>    | GGCATACGGGCAGCTAGAC; TTCTTGAGGTAGCCACTCAGC      | [3]       |
| <i>Akt</i>      | GAGTCGTGTGCTCAAGTCCA; TGCATCACAAAACACAGGCG      | [8]       |
| <i>Rp49</i>     | GACGCTTCAAGGGACAGTATCTG; AAACGCGGTTCTGCATGA     | [9]       |

## References

1. Staats, S.; Wagner, A.; Kowalewski, B.; Rieck, F.; Soukup, S.; Kulling, S.; Rimbach, G., Dietary resveratrol does not affect life span, body composition, stress response, and longevity-related gene expression in *Drosophila melanogaster*. *International Journal of Molecular Sciences* **2018**, *19*, (1), 223.
2. Obata, F.; Fons, C. O.; Gould, A. P., Early-life exposure to low-dose oxidants can increase longevity via microbiome remodelling in *Drosophila*. *Nature Communications* **2018**, *9*, (1), 975.
3. Boyd, O.; Weng, P.; Sun, X.; Alberico, T.; Laslo, M.; Obenland, D. M.; Kern, B.; Zou, S.,

- Nectarine promotes longevity in *Drosophila melanogaster*. *Free Radical Biology and Medicine* **2011**, 50, (11), 1669-1678.
4. Tinkerhess, M. J.; Healy, L.; Morgan, M.; Sujkowski, A.; Matthys, E.; Zheng, L.; Wessells, R. J., The *Drosophila* PGC-1 $\alpha$  homolog spargel modulates the physiological effects of endurance exercise. *PLOS ONE* **2012**, 7, (2), e31633.
  5. Bandarra, D.; Biddlestone, J.; Mudie, S.; Muller, H. A.; Rocha, S., Hypoxia activates IKK–NF- $\kappa$ B and the immune response in *Drosophila melanogaster*. *Bioscience Reports* **2014**, 34, (4).
  6. Seong, K. M.; Coates, B. S.; Sun, W.; Clark, J. M.; Pittendrigh, B. R., Changes in neuronal signaling and cell stress response pathways are associated with a multigenic response of *Drosophila melanogaster* to ddt selection. *Genome Biology and Evolution* **2017**, 9, (12), 3356-3372.
  7. Woodcock, Katie J.; Kierdorf, K.; Pouchelon, Clara A.; Vivancos, V.; Dionne, Marc S.; Geissmann, F., Macrophage-derived upd3 cytokine causes impaired glucose homeostasis and reduced lifespan in *Drosophila* fed a lipid-rich diet. *Immunity* **2015**, 42, (1), 133-144.
  8. Westfall, S.; Lomis, N.; Prakash, S., Longevity extension in *Drosophila* through gut-brain communication. *Scientific Reports* **2018**, 8, (1), 8362.
  9. Storelli, G.; Defaye, A.; Erkosar, B.; Hols, P.; Royet, J.; Leulier, F., *Lactobacillus plantarum* promotes *Drosophila* systemic growth by modulating hormonal signals through TOR-dependent nutrient sensing. *Cell Metabolism* **2011**, 14, (3), 403-414.
